# Supplementary material for: Wormlike micelle templated synthesis of mono- and bi-metallic nanochain networks with adjustable structure and constituents
Source: Royal Society of Chemistry journal article supplement (doi:10.1039/c6ra11193a), 2016-01-01
Supplement: c6ra11193a1.pdf [file c6ra11193a1.pdf]

Electronic Supplementary Information for

**Wormlike Micelle Templated Synthesis of Mono- and Bi-metallic  
Nanochain Networks with Adjustable Structure and Constituent**

Xinpei Gao, Fei Lu, Wenjiang Yang, Fengkang Shang, Liqiang Zheng\*

*Key Laboratory of Colloid and Interface Chemistry, Shandong University, Ministry of  
Education, Jinan 250100, China*

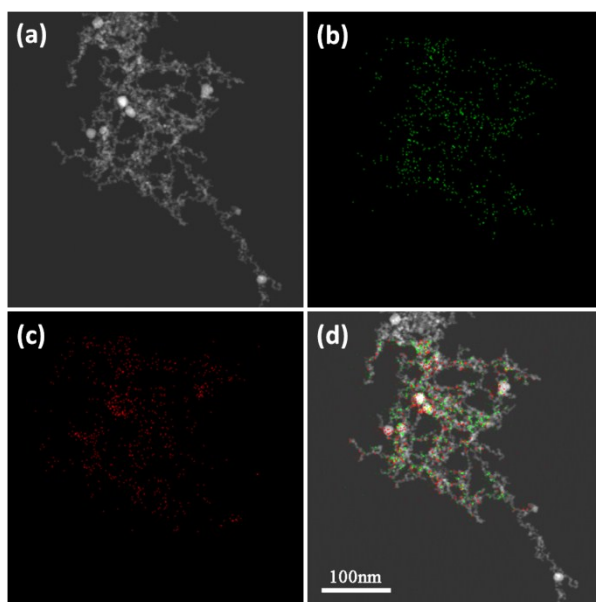

**Fig. S1 HAADF STEM and STEM-EDX mapping of Pd-Au nanochain networks  
(green for Pd and red for Au).**

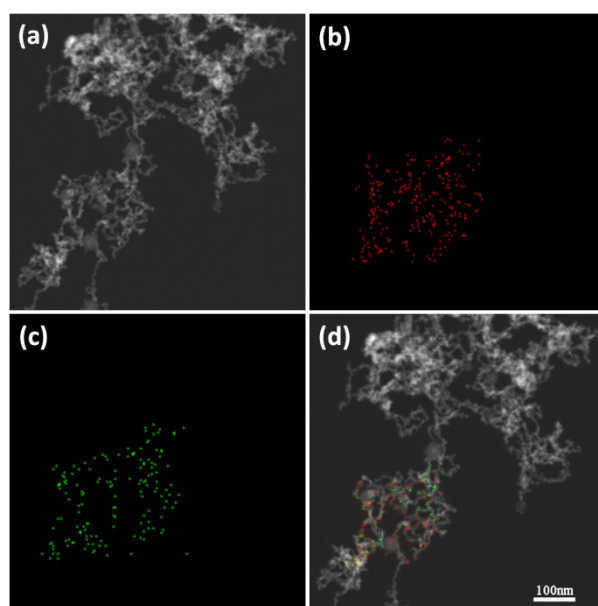

**Fig. S2 HAADF STEM and STEM-EDX mapping of Pt-Pd nanochain networks (red for Pt and green for Pd).**
